# Supplementary material for: Association between Acquired Uniparental Disomy and Homozygous Mutations and HER2/ER/PR Status in Breast Cancer
Source: PubMed Central journal article supplement (PMC2994899; doi:10.1371/journal.pone.0015094), 2010-11-30
Supplement: pone.0015094.s001.pdf [file pone.0015094.s001.pdf]

**Table S1.** Pathologic characteristics of breast tumors

| Pathologic Characteristics | GSE10099<br>(n=313) | GSE16619<br>(n=161) | GSE7545<br>(n=51) | GSE3743<br>(n=41) | GSE19399<br>(n=90) |
|----------------------------|---------------------|---------------------|-------------------|-------------------|--------------------|
| ER status                  |                     |                     |                   |                   |                    |
| Positive                   | 199 (64%)           | 54 (33.5%)          | 6 (11.8%)         | 16 (39.0%)        | na                 |
| Negative                   | 114 (36%)           | 38 (23.6%)          | 11 (21.6%)        | 24 (58.5%)        | na                 |
| Unknown                    | 0                   | 68 (42.2%)          | 34 (66.7%)        | 1 (2.4%)          | na                 |
| PR status                  |                     |                     |                   |                   |                    |
| Positive                   | 156 (49.8%)         | 51 (31.7%)          | 4 (7.8%)          | 14 (34.1%)        | na                 |
| Negative                   | 157 (50.2%)         | 41 (25.5%)          | 9 (17.6%)         | 26 (63.4%)        | na                 |
| Unknown                    | 0                   | 69 (42.9%)          | 38 (74.5%)        | 1 (2.4%)          | na                 |
| HER2/neu status            |                     |                     |                   |                   |                    |
| Positive                   | 79 (25.2%)          | 52 (32.3%)          | 10 (19.6%)        | 8 (19.5%)         | na                 |
| Negative                   | 234 (74.8%)         | 23 (14.3%)          | 5 (9.8%)          | 30 (73.2)         | na                 |
| Unknown                    | 0                   | 86 (53.4%)          | 36 (70.6%)        | 3 (7.3%)          | na                 |
| Grade                      |                     |                     |                   |                   |                    |
| I                          | na                  | 10 (6.2%)           | na                | 0                 | na                 |
| II                         | na                  | 47 (29.2%)          | na                | 0                 | na                 |
| III                        | na                  | 96 (59.6%)          | na                | 41 (100%)         | na                 |
| Unknown                    | na                  | 8 (5.0%)            | na                | 0                 | na                 |
