# Supplementary material for: Association between Acquired Uniparental Disomy and Homozygous Mutations and HER2/ER/PR Status in Breast Cancer
Source: PubMed Central journal article supplement (PMC2994899; doi:10.1371/journal.pone.0015094), 2010-11-30
Supplement: pone.0015094.s002.pdf [file pone.0015094.s002.pdf]

Table S2. Correlation between aUPD regions and grade, invasive, infiltrating, lobular and ductal type of breast cancer.

| Tumor type and Grade                           | aUPD at chromosome | P-value*      |
|------------------------------------------------|--------------------|---------------|
| Invasive vs Infiltrating                       | 17q                | 0.9355        |
| Lobular vs Ductal                              | 17q                | 0.3984        |
| Invasion+ vs Invasion-<br>Grade 3 vs Grade 1&2 | 17q                | 0.7383        |
|                                                | 17q                | <b>0.0021</b> |
| Invasive vs Infiltrating                       | 13q                | 1.000         |
| Lobular vs Ductal                              | 13q                | 1.000         |
| Invasion+ vs Invasion-<br>Grade 3 vs Grade 1&2 | 13q                | 1.000         |
|                                                | 13q                | <b>0.0060</b> |
| Invasive vs Infiltrating                       | 3p                 | 0.7965        |
| Lobular vs Ductal                              | 3p                 | 1.000         |
| Invasion+ vs Invasion-<br>Grade 3 vs Grade 1&2 | 3p                 | 1.000         |
|                                                | 3p                 | 0.0555        |
| Invasive vs Infiltrating                       | 11q                | 0.1138        |
| Lobular vs Ductal                              | 11q                | 0.2484        |
| Invasion+ vs Invasion-<br>Grade 3 vs Grade 1&2 | 11q                | 0.3332        |
|                                                | 11q                | 0.3849        |
| Invasive vs Infiltrating                       | 2q                 | 0.7430        |
| Lobular vs Ductal                              | 2q                 | 0.9633        |
| Invasion+ vs Invasion-<br>Grade 3 vs Grade 1&2 | 2q                 | 0.6818        |
|                                                | 2q                 | 0.484         |
| Invasive vs Infiltrating                       | 5q                 | <b>0.0303</b> |
| Lobular vs Ductal                              | 5q                 | 0.9633        |
| Invasion+ vs Invasion-<br>Grade 3 vs Grade 1&2 | 5q                 | 0.3332        |
|                                                | 5q                 | 0.1389        |
| Invasive vs Infiltrating                       | 14q                | 0.6818        |
| Lobular vs Ductal                              | 14q                | 0.6657        |
| Invasion+ vs Invasion-<br>Grade 3 vs Grade 1&2 | 14q                | 0.2467        |
|                                                | 14q                | 0.2182        |
| Invasive vs Infiltrating                       | 9q                 | 0.3388        |
| Lobular vs Ductal                              | 9q                 | 0.4842        |
| Invasion+ vs Invasion-<br>Grade 3 vs Grade 1&2 | 9q                 | 0.6022        |
|                                                | 9q                 | 0.0919        |
| Invasive vs Infiltrating                       | 9p                 | 0.1702        |
| Lobular vs Ductal                              | 9p                 | 0.8803        |
| Invasion+ vs Invasion-<br>Grade 3 vs Grade 1&2 | 9p                 | 0.5308        |
|                                                | 9p                 | 0.3539        |
| Invasive vs Infiltrating                       | 10q                | 0.7979        |
| Lobular vs Ductal                              | 10q                | 0.2296        |
| Invasion+ vs Invasion-<br>Grade 3 vs Grade 1&2 | 10q                | 0.9388        |
|                                                | 10q                | 0.3259        |

\*Fisher's exact tests were used for evaluate correlations between aUPD regions and lobular or ductal, invasive or infiltrating, and Spearman correlation analyses used for evaluate correlations between aUPD regions and grade.
